# Supplementary figures and images for: Heterogenic Origin of Micro RNAs in Atlantic Salmon (Salmo salar) Seminal Plasma
Source: MDPI journal article supplement (doi:10.3390/ijms21082723), 2020-04-15

# Juvenile Ovary

A) ssa-miR-15c-5p

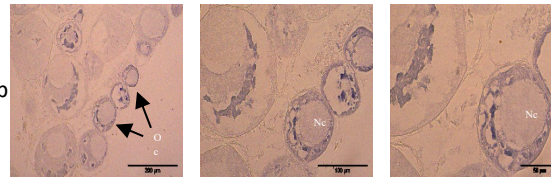

B) ssa-miR-30d-5p

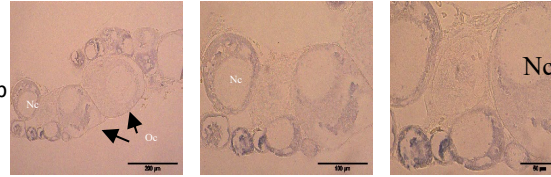

C) ssa-miR-92a-5p

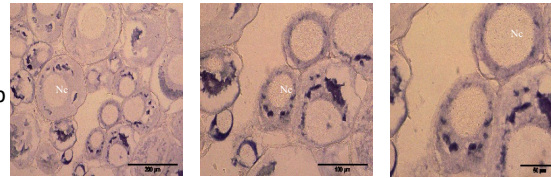

D) ssa-miR-93a-5p

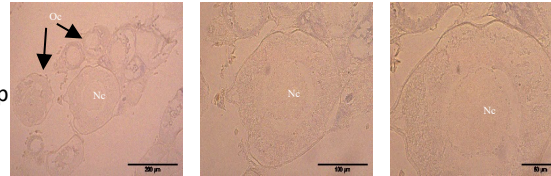

E) ssa-miR-202-5p

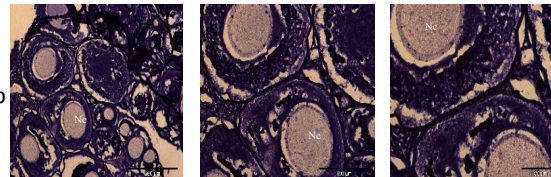

F) ssa-miR-730-5p

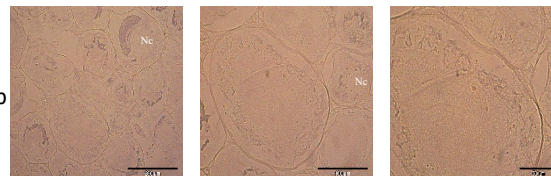

G) U6 snRNA

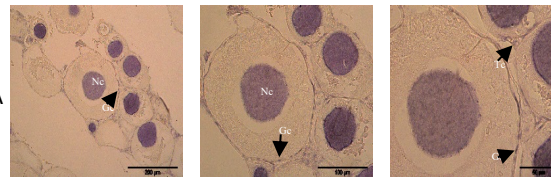

Supplement: s1 [file s1]

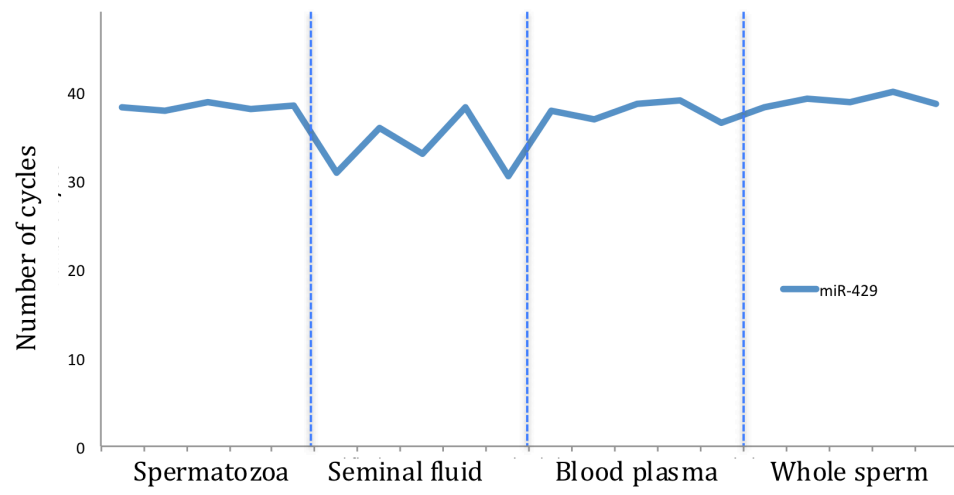

Supplement: s1 [file s1]

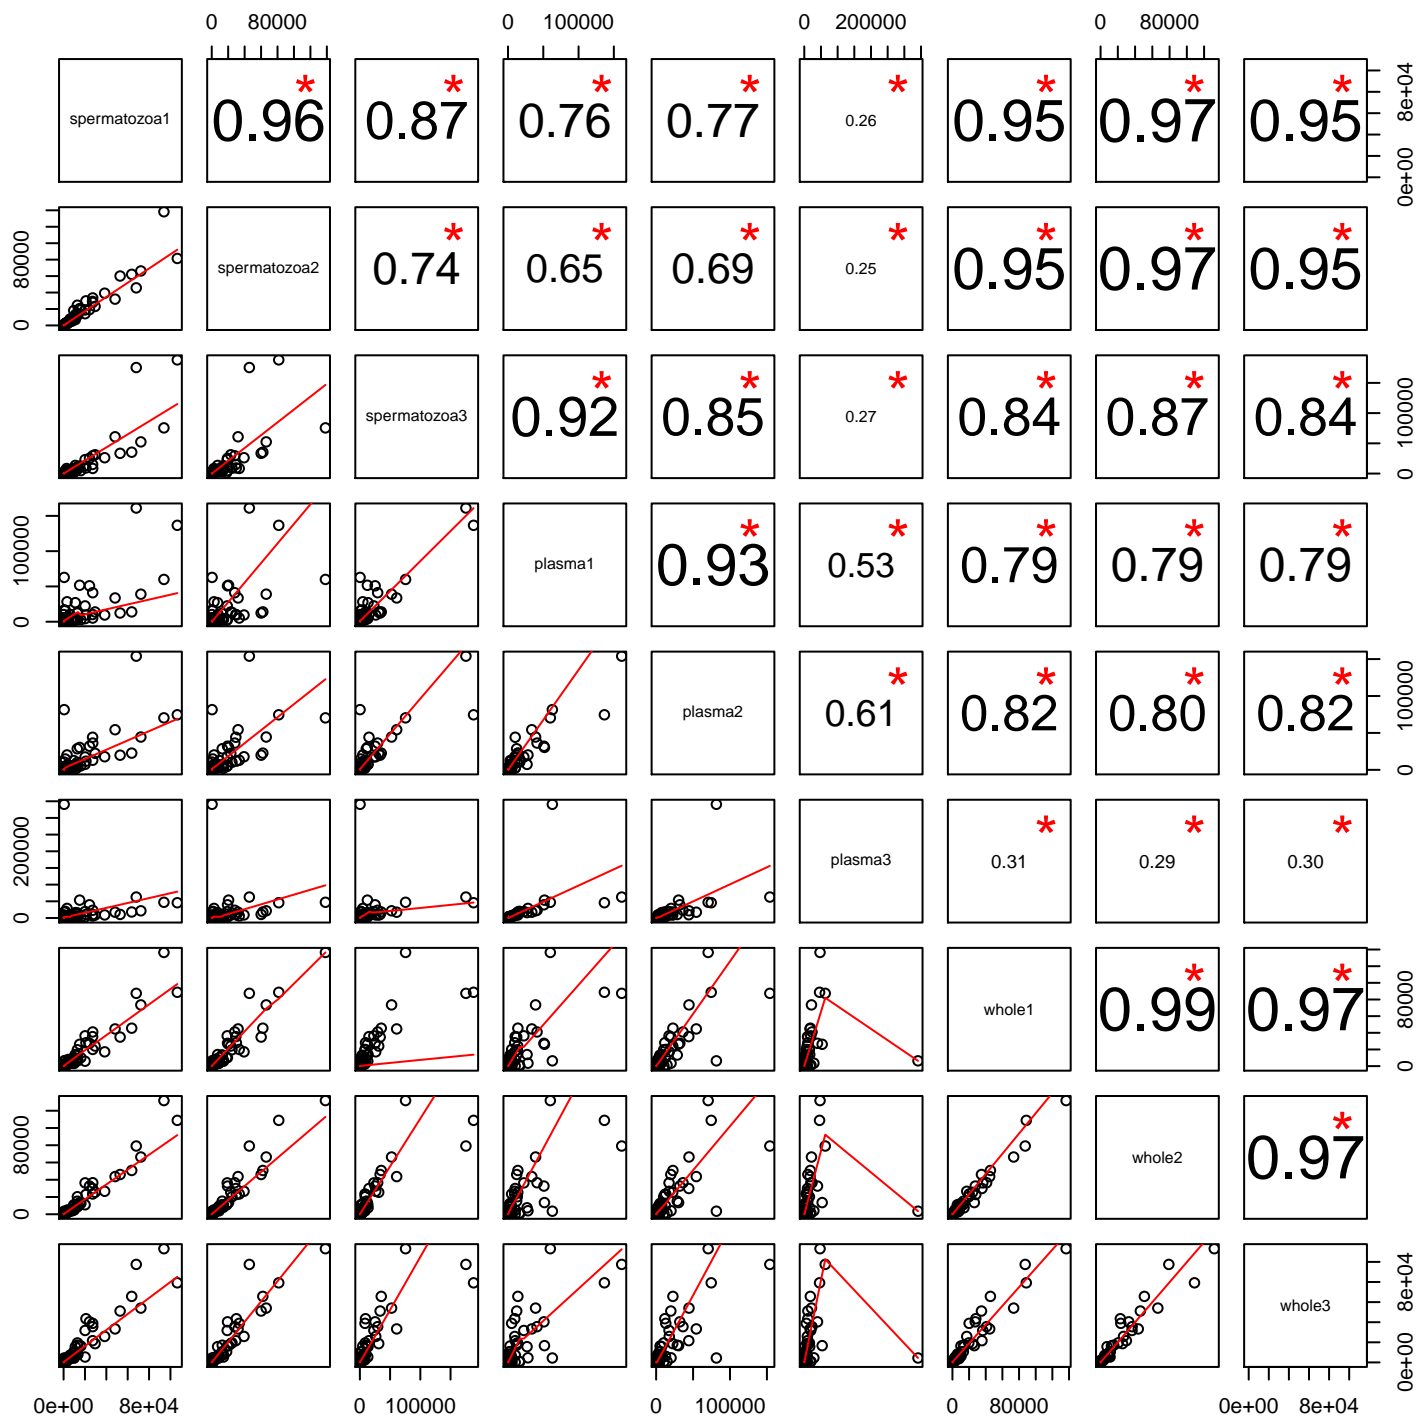

Supplement: s1 [file s1]

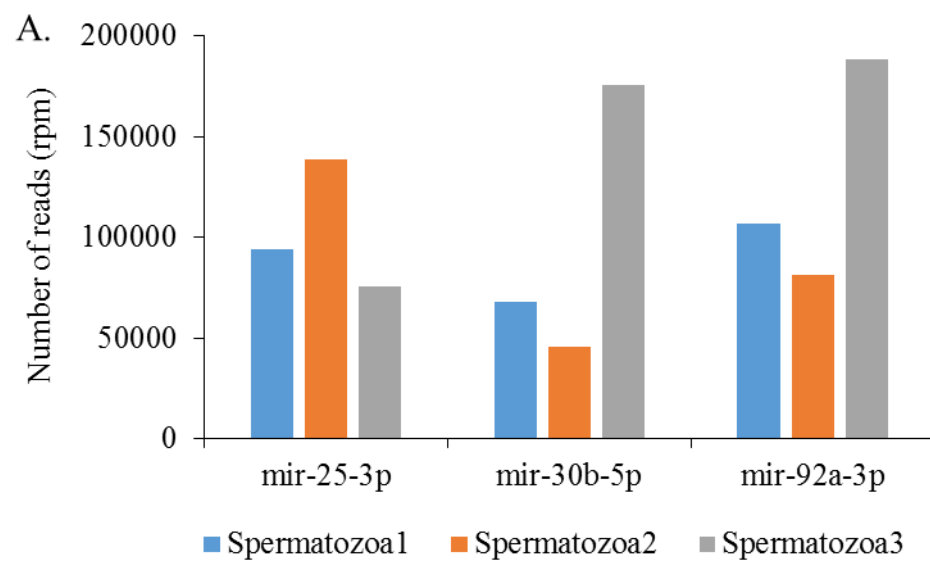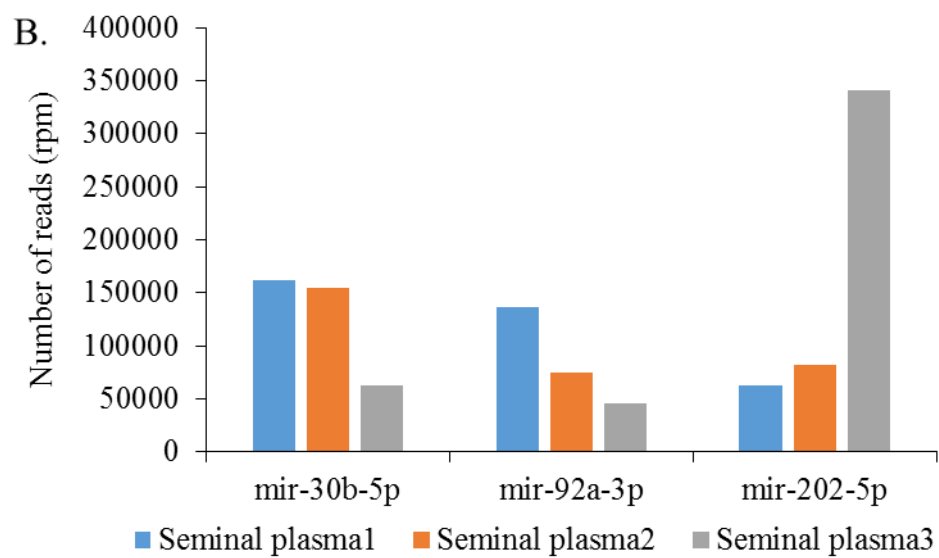

Supplement: s1 [file s1]

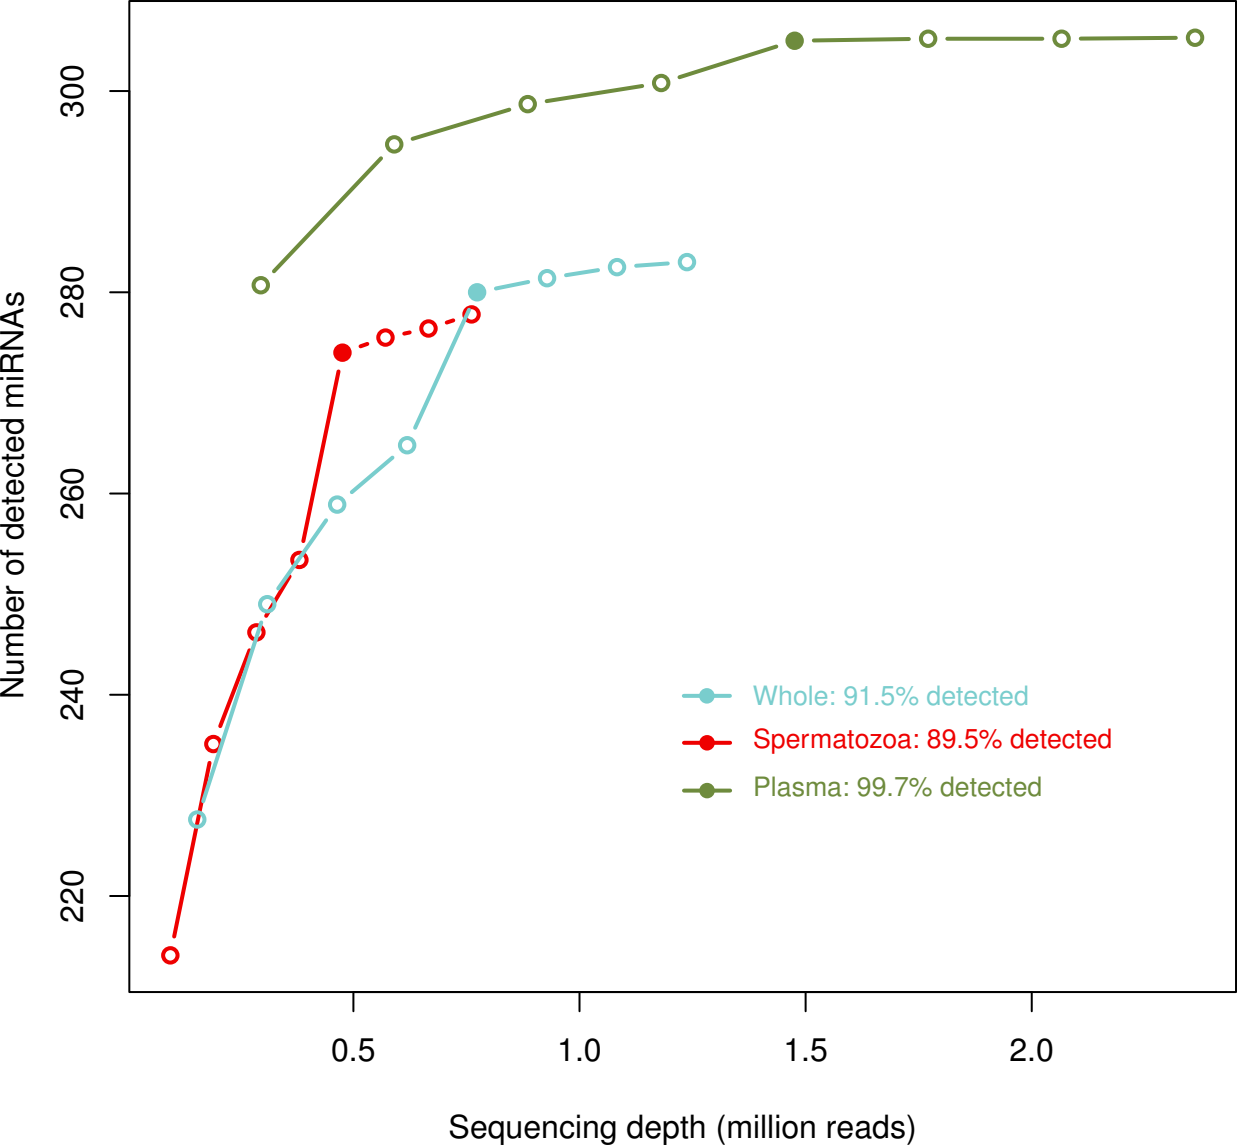

Supplement: s1 [file s1]

A. Juvenile Testis

B. Mature Testis

U6 snRNA

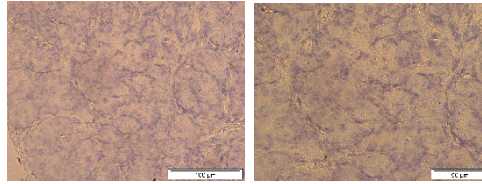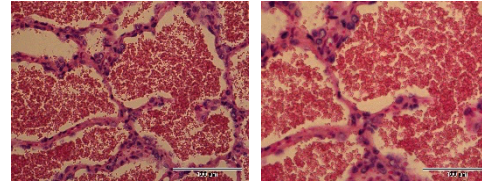

Scramble probe

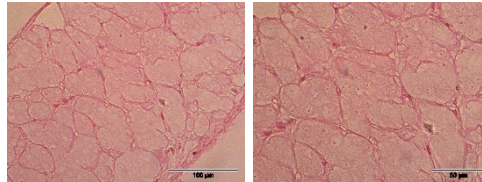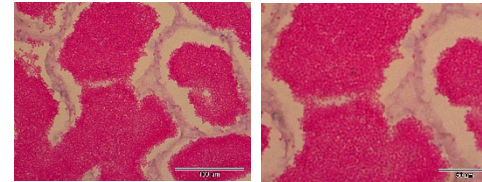

Supplement: s1 [file s1]
